# Supplementary material for: OsLPR5 Encoding Ferroxidase Positively Regulates the Tolerance to Salt Stress in Rice
Source: MDPI journal article supplement (doi:10.3390/ijms24098115), 2023-04-30
Supplement: s1 [file s1]

## Supporting Information

*OsLPR5* encoding ferroxidase positively regulates the tolerance to salt stress in rice

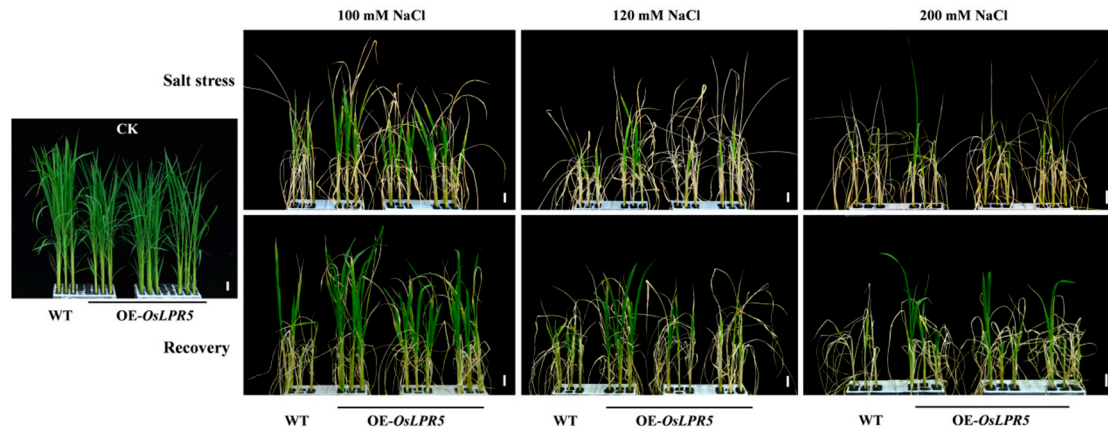

Figure S1. Overexpression of *OsLPR5* enhances the salinity tolerance of rice at the seedling stage exposed to 100, 120 and 200 mM NaCl stress for 7 days (Scale bars, 2 cm).

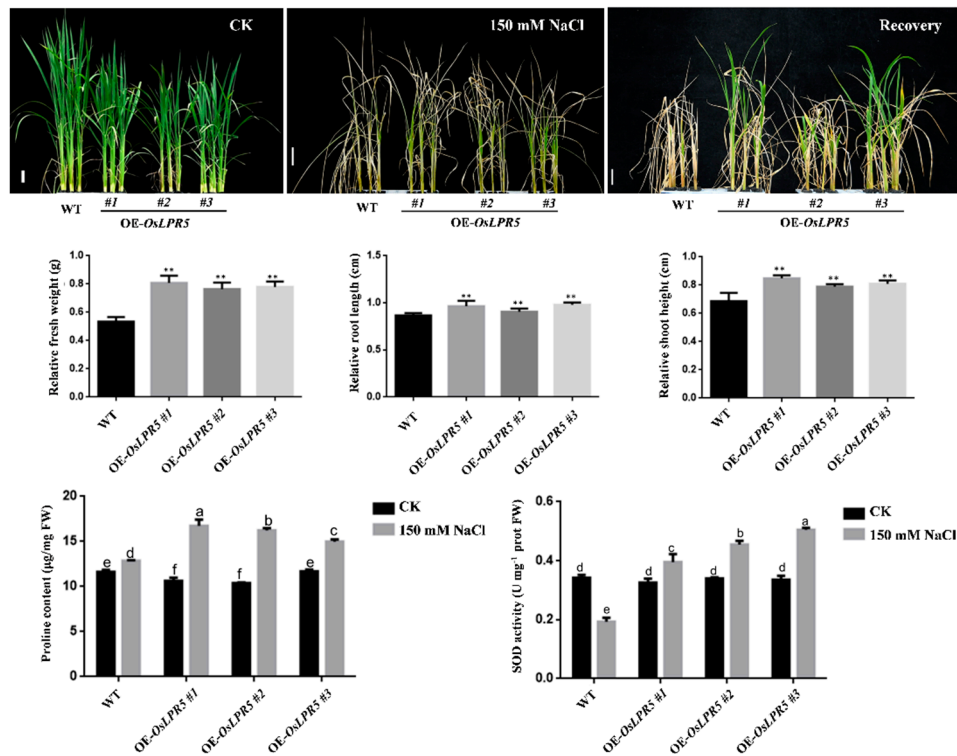

Figure S2. Overexpression of *OsLPR5* enhances the salinity tolerance of rice at the seedling stage exposed to 150 mM NaCl stress for 7 days (Scale bars, 2 cm). Different letters indicate significant differences between means as determined using ANOVA followed by Duncan's test ( $P < 0.05$ ).

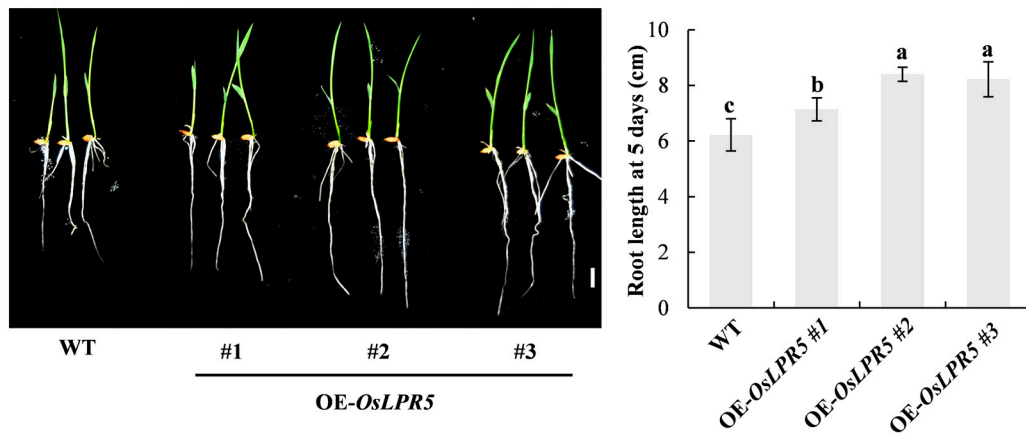

Figure S3. Overexpression of *OsLPR5* promotes the length of the primary after germination and growth for 5 days compared with wild type (WT) (Scale bars, 2 cm). Different letters indicate significant differences between means as determined using ANOVA followed by Duncan's test ( $P < 0.05$ ).

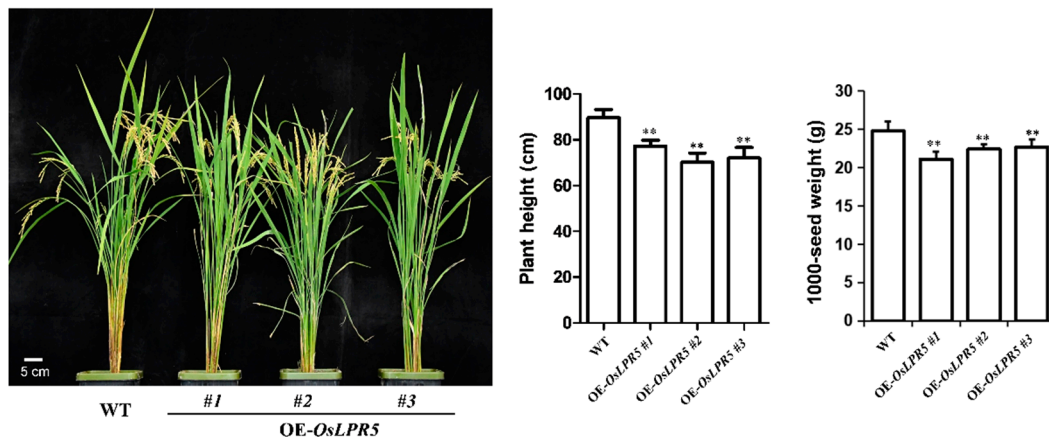

Figure S4. The photograph, plant height and 1000-grain weight of wild type and *OsLPR5* overexpressed plants in the mature stage. Asterisk represents statistical difference at  $**P < 0.01$  by t-test.

Table S1. Primers used for vector construction and qRT-PCR.

| Primer      | Sequence (5'-3')        |
|-------------|-------------------------|
| OsLPR5-RT-F | CGAGGGATTCCAGGTGTTCAAG  |
| OsLPR5-RT-R | GATCCAGGATGTGGCAGTGGTAG |
| OsLPR5-U3-F | ggcaACAGCCGCCAACAACACAG |

---

|               |                                               |
|---------------|-----------------------------------------------|
| OsLPR5-U3-R   | aaacCTGTGTTGTTGGCGGCTGT                       |
| OsLPR5-OE-F   | agctcggtacccggggatcctctagaATGAGTCCGAGGATTCAGC |
| OsLPR5-OE-R   | tcctcgcccttgctcaccatgctgacTGGAAGCAGCTTCAGAGGC |
| OsP5CS1-RT-F  | TCTGCTCAGTGATGTGGATG                          |
| OsP5CS1-RT-R  | CCTACACGAGATTTGTCTCC                          |
| OsYSL15-RT-F  | GCGTTCCGCCGTGCTCACGAACGTGG                    |
| OsYSL15-RT-R  | ATCCTCCACCCATGAAATTAAACAC                     |
| OsHKT2;1-RT-F | CGGCGTTTCTGGCATCA                             |
| OsHKT2;1-RT-R | GCACCGAACAATGTGACCAA                          |

---
